# Supplementary material for: Weighted Gene Correlation Network Analysis (WGCNA) Reveals Novel Transcription Factors Associated With Bisphenol A Dose-Response
Source: Front Genet. 2018 Nov 12;9:508. doi: 10.3389/fgene.2018.00508 (PMC6240694; doi:10.3389/fgene.2018.00508)
Supplement: TABLE S1 — Protein-protein interaction and enrichment from STRING database. [file Table_1.XLSX]

## Sheet: STRING PPI ENRICHMENT AND FUNCT
	PPI enrichment p-value:	GO ID	Molecular Function	Adjutsted p-value	GO ID	Biological Process	Adjutsted p-value
BPA NETWORK
LightCyan1	< 1.0e-16	GO:0034976	response to endoplasmic reticulum stress	2.93e-17	GO:0003756	protein disulfide isomerase	2.78e-05
		GO:0030968	endoplasmic reticulum unfolded protein response	2.02e-12	GO:0016853	isomerase activity	0.0014
		GO:0034620	cellular response to unfolded protein	2.02e-12
Royal Blue	0.000645	O:0007399	nervous system development	0.00248	GO:0005515	protein binding	0.0155
		GO:0007275	multicellular organismal development	0.00416	GO:0008092	cytoskeletal protein binding	0.0155
		GO:0032502	developmental process	0.00416	GO:0016667	oxidoreductase activity, acting on a sulfur group of donors	0.0301
Ivory	3.37e-05
Green	8.51e-13				GO:0006986	response to unfolded protein	9.52e-05
					GO:0006457	protein folding	0.00544
Dark Grey	8.51e-13				GO:0006986	response to unfolded protein	9.52e-05
					GO:0006457	protein folding	0.00544
Grey60	0.0022	GO:0033554	cellular response to stress	0.0363
Green	5.55e-10	GO:0016043	cellular component organization	0.0178											GO:0031981	nuclear lumen	40	9.69e-05
		GO:0051179	localization	0.0178											GO:0031974	membrane-enclosed lumen	44	9.77e-05
		GO:0051726	regulation of cell cycle	0.0178											GO:0043231	intracellular membrane-bounded organelle	77	9.77e-05
LightCyan	5.33e-15	GO:0034976	response to endoplasmic reticulum stress	2.01e-10	GO:0035575	histone demethylase activity (H4-K20 specific)	9.08e-08
		GO:0035574	histone H4-K20 demethylation	1.52e-07	GO:0005515	protein binding	1.6e-05
ESTROGEN NETWORK
Dark Red	N/A	GO:0002429	immune response-activating cell surface receptor signaling pathway	0.0041
		GO:0002757	immune response-activating signal transduction	0.0041
Turquoise	< 1.0e-16	GO:0000278	mitotic cell cycle	9.12e-70	GO:0044822	poly(A) RNA binding	2.33e-32
		GO:0007049	cell cycle	3.18e-63	GO:0003723	RNA binding	4.48e-32
Dark Green	2.63e-11	GO:0010467	gene expression	2.41e-06	GO:0044822	poly(A) RNA binding	5.64e-06
		GO:0034641	cellular nitrogen compound metabolic process	2.48e-06	GO:0003723	RNA binding	0.000104
LOW DOSE BPA NETWORK
Turqoise	< 1.0e-16	GO:0044260	cellular macromolecule metabolic process	1.58e-16	GO:0044822	poly(A) RNA binding	2.17e-18
		GO:0044237	cellular metabolic process	1.24e-15	GO:0003723	RNA binding	3.6e-16
Dark Green	0.000509	GO:0019899	enzyme binding	0.0332
Dark Red	N/A	N/A		N/A		KEGG		EGG pathway Insulin Signaling (p-value 0.0028
Brown	<1.0e-16,	GO:0044237	cellular metabolic process	3.09e-15	GO:0044822	poly(A) RNA binding	1.67e-15
		GO:0044238	primary metabolic process	3.09e-15	GO:0003723	RNA binding	2.01e-14

## Sheet: TFs for BPA ONLY GENES
	Low-dose BPA Network Only Genes TF Analysis
	TF	Adjusted p-value
	RACK7	9.189e-09
	ELK1	4.936e-05
	HIF1A_	0.00164
	PADI4	5.836e-05
	E2F1	0.0002029
